# Supplementary material
Source: Springer Nature journal article supplement (https://www.springerprofessional.de/resource/supplementary/13638_2011_112_MOESM3_ESM.pdf/11897068)
Supplement: MOESM3 [file 11897068]

## Advantages of Clustering in PDCAs

```
graph TD; A[Advantages of Clustering in PDCAs] --> B[CHs Act as Server Nodes]; A --> C[Repository for members Certificates]; A --> D[Determining Repository Nodes]; A --> E[CRLs Maintenance and Deployment]; A --> F[Locating other PDCA Server nodes]; A --> G[Decreasing Communication Overheads];
```

CHs Act  
as Server  
Nodes

Repository  
for members  
Certificates

Determining  
Repository  
Nodes

CRLs  
Maintenance  
and Deployment

Locating  
other PDCA  
Server nodes

Decreasing  
Communication  
Overheads
